# Supplementary material
Source: MDPI journal article supplement (https://www.mdpi.com/2227-7102/12/7/448)
Supplement: s1 [file s1]

## SUPPLEMENTAY MATERIAL

### RELATIONAL COORDINATION IN HIGHER EDUCATION STUDENT SURVEY

1. **University:**

2. **Age**

|                    |  |
|--------------------|--|
| Over 25 years old  |  |
| Under 25 years old |  |

3. **Gender**

|        |  |
|--------|--|
| Male   |  |
| Female |  |

4. **Please explain the factors that have improved or worsened the quality of your University:**

|                                                              | Improved | Worsened |
|--------------------------------------------------------------|----------|----------|
| Administrative organization (registrations, validations ...) |          |          |
| Academic organization (schedules, exam planning ...)         |          |          |
| Material resources (classrooms, computers ...)               |          |          |
| Virtual campus                                               |          |          |
| Lectures                                                     |          |          |
| Training content                                             |          |          |

5. **Do the people who belong to these areas have the need to offer you information at certain times?**

|                         | Never<br>(1) | Rarely<br>(2) | Occasionally<br>(3) | Frequently<br>(4) | Constantly<br>(5) |
|-------------------------|--------------|---------------|---------------------|-------------------|-------------------|
| Administrative officers |              |               |                     |                   |                   |
| Lectures                |              |               |                     |                   |                   |
| Classmates              |              |               |                     |                   |                   |

6. **Do people who belong to the following work areas communicate with you frequently?**

|                         | Never<br>(1) | Rarely<br>(2) | Occasionally<br>(3) | Frequently<br>(4) | Constantly<br>(5) |
|-------------------------|--------------|---------------|---------------------|-------------------|-------------------|
| Administrative officers |              |               |                     |                   |                   |
| Lectures                |              |               |                     |                   |                   |
| Classmates              |              |               |                     |                   |                   |

7. **When any type of problem appears (study, logistics, documentation ...), how much did the following profiles help you to solve your problem?**

|                           | Never<br>(1) | Rarely<br>(2) | Occasionally<br>(3) | Frequently<br>(4) | Constantly<br>(5) |
|---------------------------|--------------|---------------|---------------------|-------------------|-------------------|
| Myself                    |              |               |                     |                   |                   |
| Lectures                  |              |               |                     |                   |                   |
| Students' representatives |              |               |                     |                   |                   |

|                         |  |  |  |  |  |
|-------------------------|--|--|--|--|--|
| Administrative officers |  |  |  |  |  |
| Classmates              |  |  |  |  |  |

**8. How well do the following profiles know about your role in the university and the problems that arise?**

|                           | Never<br>(1) | Rarely<br>(2) | Occasionally<br>(3) | Frequently<br>(4) | Constantly<br>(5) |
|---------------------------|--------------|---------------|---------------------|-------------------|-------------------|
| Lectures                  |              |               |                     |                   |                   |
| Students' representatives |              |               |                     |                   |                   |
| Administrative officers   |              |               |                     |                   |                   |
| Classmates                |              |               |                     |                   |                   |

**9. How much do the following profiles respect your role at the university?**

|                           | Never<br>(1) | Rarely<br>(2) | Occasionally<br>(3) | Frequently<br>(4) | Constantly<br>(5) |
|---------------------------|--------------|---------------|---------------------|-------------------|-------------------|
| Lectures                  |              |               |                     |                   |                   |
| Students' representatives |              |               |                     |                   |                   |
| Administrative officers   |              |               |                     |                   |                   |
| Classmates                |              |               |                     |                   |                   |

**10. How well do the following profiles share your goals at the university?**

|                           | Never<br>(1) | Rarely<br>(2) | Occasionally<br>(3) | Frequently<br>(4) | Constantly<br>(5) |
|---------------------------|--------------|---------------|---------------------|-------------------|-------------------|
| Lectures                  |              |               |                     |                   |                   |
| Students' representatives |              |               |                     |                   |                   |
| Administrative officers   |              |               |                     |                   |                   |
| Classmates                |              |               |                     |                   |                   |

**11. Indicate your level of satisfaction with the following profiles (1 very low, 5 very high):**

|                           | 1 | 2 | 3 | 4 | 5 |
|---------------------------|---|---|---|---|---|
| Lectures                  |   |   |   |   |   |
| Students' representatives |   |   |   |   |   |
| Administrative officers   |   |   |   |   |   |
| Materials                 |   |   |   |   |   |
| Communication channels    |   |   |   |   |   |
| Training contents         |   |   |   |   |   |

# TABLES

**Table S1.** Principal components (PC) loading matrix of rotated of UEB\_2020

| Items                          | Loading | Eigenvalue | Explained variance (%) | $\alpha$ Cronbach | PC |
|--------------------------------|---------|------------|------------------------|-------------------|----|
| 16.RESPE <sub>Lect</sub>       | 0.692   | 10.29      | 44.72                  | 0.934             | 1  |
| 17.RESPE <sub>Repres</sub>     | 0.727   |            |                        |                   |    |
| 18.RESPE <sub>Admin</sub>      | 0.730   |            |                        |                   |    |
| 19.RESPE <sub>Class</sub>      | 0.735   |            |                        |                   |    |
| 20.SHARAGOAL <sub>Lect</sub>   | 0.785   |            |                        |                   |    |
| 21.SHARAGOAL <sub>Repres</sub> | 0.775   | 1.72       | 7.49                   | 0.844             | 2  |
| 22.SHARAGOAL <sub>Admin</sub>  | 0.756   |            |                        |                   |    |
| 23.SHARAGOAL <sub>Class</sub>  | 0.771   |            |                        |                   |    |
| 8.SOLPRO <sub>Lect</sub>       | 0.600   |            |                        |                   |    |
| 9.SOLPRO <sub>Repres</sub>     | 0.768   |            |                        |                   |    |
| 10.SOLPRO <sub>Admin</sub>     | 0.723   | 1.60       | 6.97                   | 0.756             | 3  |
| 13.SKNO <sub>Repres</sub>      | 0.664   |            |                        |                   |    |
| 14.SKNO <sub>Admin</sub>       | 0.668   |            |                        |                   |    |
| 1.ACCU <sub>Admin</sub>        | 0.725   |            |                        |                   |    |
| 4.FREQ <sub>Admin</sub>        | 0.631   |            |                        |                   |    |
| 5.FREQ <sub>Lect</sub>         | 0.630   | 1.14       | 4.95                   | 0.771             | 4  |
| 3ACCU <sub>Class</sub>         | 0.682   |            |                        |                   |    |

**Table S2.** Centroids for each cluster of UEB\_2020

| Components                    | PC <sup>1</sup> | Cluster 1          | Cluster 2           | Cluster 3           |
|-------------------------------|-----------------|--------------------|---------------------|---------------------|
| Institutional cooperation     | 1               | 7.301 <sup>c</sup> | -0.895 <sup>b</sup> | -7.243 <sup>a</sup> |
| Institutional solving-problem | 2               | 5.485 <sup>c</sup> | -0.512 <sup>b</sup> | -5.637 <sup>a</sup> |
| Administrative communication  | 3               | 4.468 <sup>c</sup> | 0.052 <sup>b</sup>  | -5.096 <sup>a</sup> |
| Classmates' communication     | 4               | 3.982 <sup>c</sup> | 0.117 <sup>b</sup>  | -4.618 <sup>a</sup> |

<sup>1</sup> Principal component. <sup>a,b,c</sup> Within row, averages with different superscript differ significantly, p-value <0.001

FIGURES

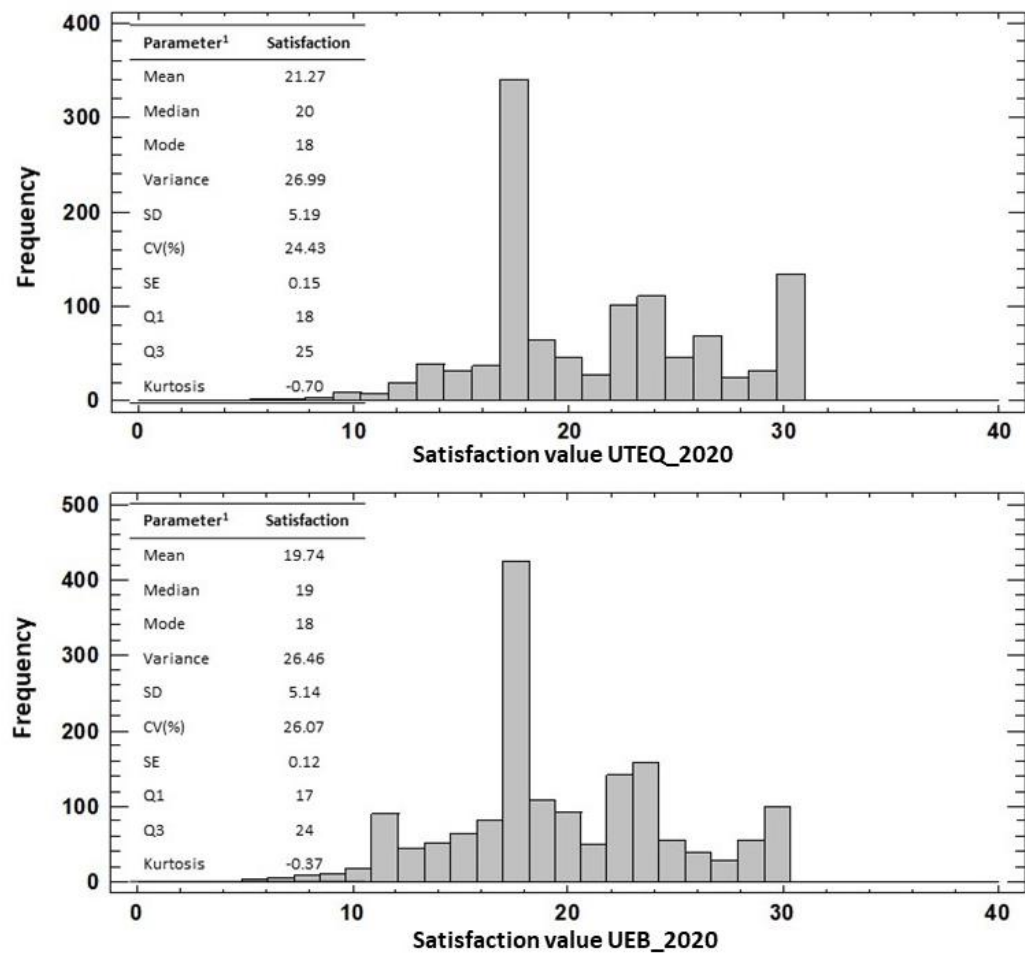

Figure S1. Statistical parameters of the satisfaction value for each university

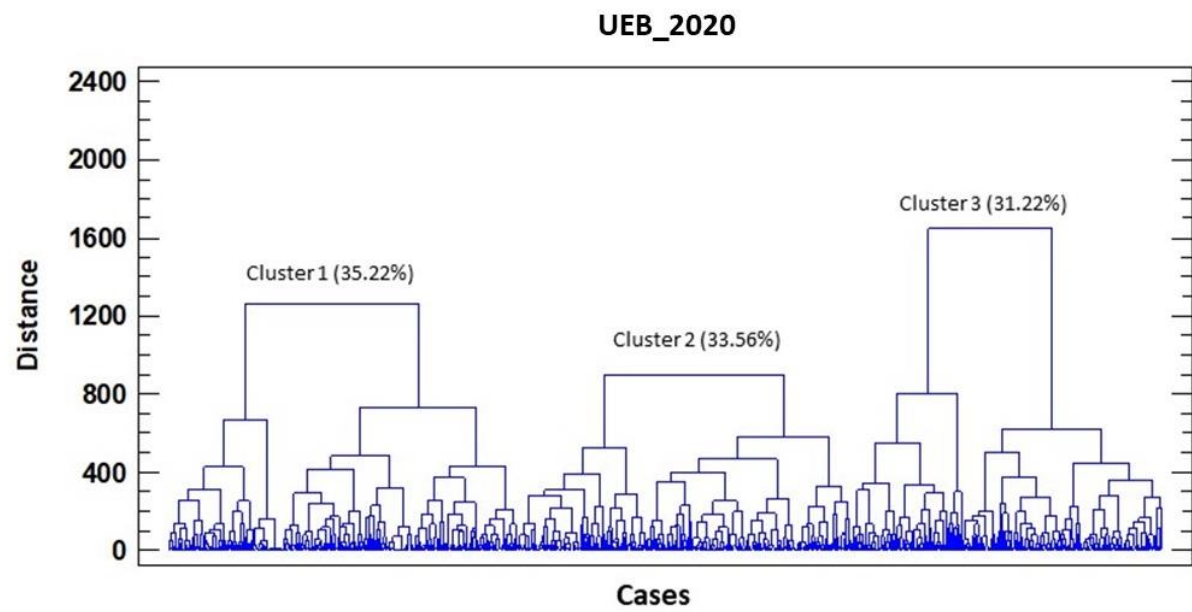

**Figure S2.** Relational coordination clusters of UEB\_2020

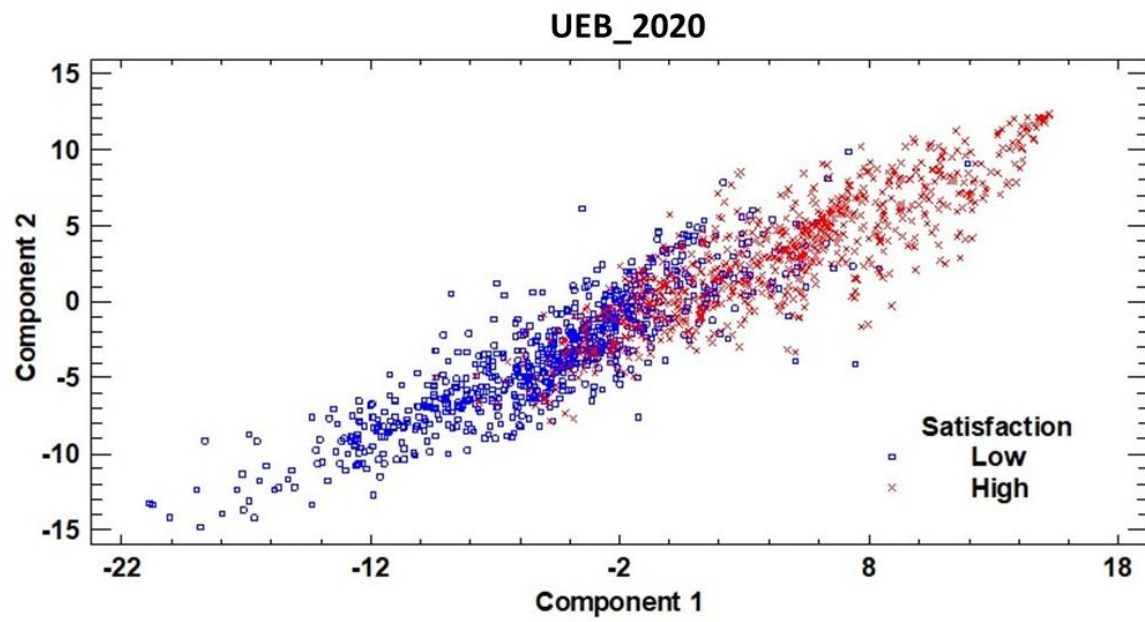

**Figure S3.** Satisfaction according to the first two components of UEB\_2020

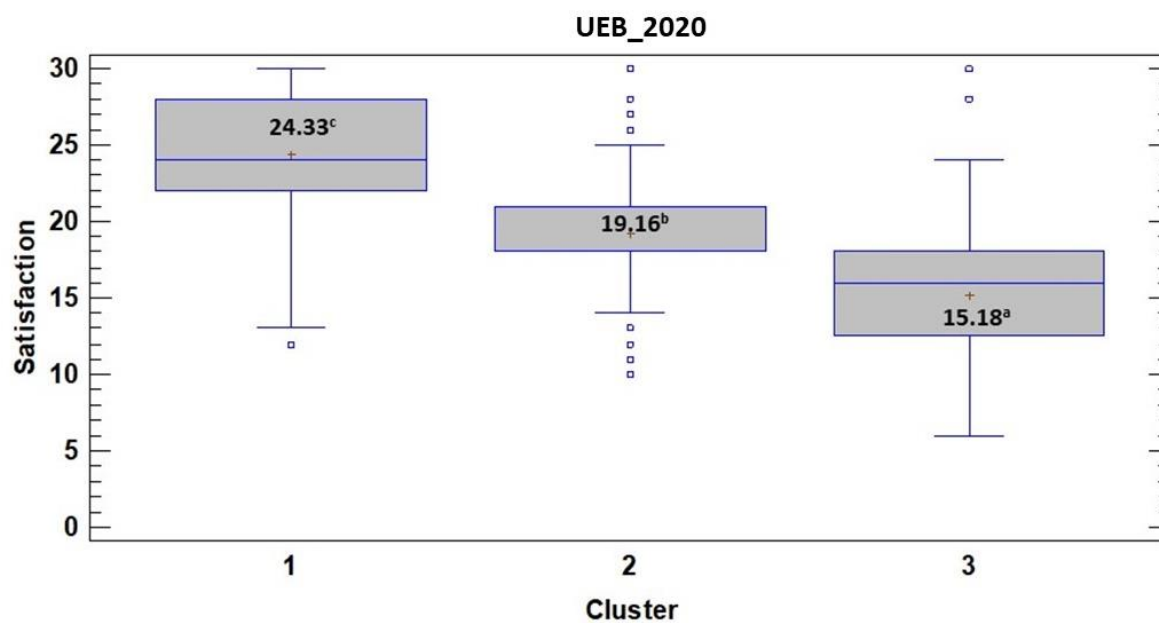

**Figure S4.** Total satisfaction in each relational coordination model of UEB\_2020. Mean a,b,c with different superscript differ significantly, p-value <0.001
